# Supplementary material for: Incidence, Risk Factors and Impact on Clinical Outcomes of Bloodstream Infections in Patients Hospitalised with COVID-19: A Prospective Cohort Study
Source: MDPI journal article supplement (doi:10.3390/antibiotics10091031), 2021-08-24
Supplement: s1 [file s1]

**SUPPLEMENTARY TABLE S1. List of pathogens isolated from blood cultures considered contaminants and excluded from the study**

| Pathogens                          | N=92 |
|------------------------------------|------|
| <i>Staphylococcus epidermidis</i>  | 38   |
| <i>Staphylococcus hominis</i>      | 28   |
| <i>Staphylococcus haemolyticus</i> | 9    |
| <i>Staphylococcus capitis</i>      | 6    |
| <i>Staphylococcus pettenkoferi</i> | 3    |
| <i>Staphylococcus warneri</i>      | 2    |
| <i>Bacillus clausii</i>            | 1    |
| <i>Bacillus spp</i>                | 1    |
| <i>Bulholderia cepacia</i>         | 1    |
| <i>Corynebacterium striatum</i>    | 1    |
| <i>Gemella Haemolysans</i>         | 1    |
| <i>Streptococcus mitis/oralis</i>  | 1    |

**SUPPLEMENTARY TABLE S2. List of other microbiological findings in patients included in the study**

| Other microbiological findings, N (%)                  | Patients without BSI<br>N=1,282 (94.9%) | Patients with<br>CA/HCA-BSI<br>N= 18 (1.3%) | Patients<br>with<br>HA-BSI<br>N= 51<br>(3.8%) | p value | Overall<br>N=1,351 |
|--------------------------------------------------------|-----------------------------------------|---------------------------------------------|-----------------------------------------------|---------|--------------------|
| Respiratory samples (sputum/BAS/BAL)                   | 51 (3.9%)                               | 0 (0.0%)                                    | 10 (19.6%)                                    | <0,001  | 61 (4.5%)          |
| Urine cultures                                         | 110 (8.6%)                              | 6 (33.3%)                                   | 23 (45.1%)                                    | <0,001  | 139 (10.3%)        |
| Positive Pneumococcal urinary antigen <sup>a</sup>     | 44 (3.4%)                               | 2 (11.1%)                                   | 1 (1.9%)                                      | 0,111   | 47 (3.5%)          |
| Positive Legionella urinary antigen <sup>b</sup>       | 4 (0.3%)                                | 0 (0.0%)                                    | 0 (0.0%)                                      | 0,929   | 4 (0.3%)           |
| Positive for Influenza <sup>c</sup>                    | 0 (0.0%)                                | 0 (0.0%)                                    | 0 (0.0%)                                      |         | 0 (0.0%)           |
| Serology for atypical pulmonary pathogens <sup>d</sup> |                                         |                                             |                                               |         |                    |
| Chlamydia                                              | 2 (0.2%)                                | 0 (0.0%)                                    | 0 (0.0%)                                      | 0,934   | 2 (0.1%)           |
| Mycoplasma                                             | 34 (2.7%)                               | 1 (5.6%)                                    | 1 (1.9%)                                      | 0,670   | 36 (2.7%)          |
| MDR colonization                                       | 15 (1.2%)                               | 2 (11.1%)                                   | 1 (2.0%)                                      | 0,001   | 18 (1.33%)         |
| Blood cultures positive for contaminants               | 65 (5.1%)                               | 3 (16.7%)                                   | 14 (27.5%)                                    | <0,001  | 82 (6.1%)          |
| Other                                                  | 11 (0.9%)                               | 3 (16.7%)                                   | 6 (11.8%)                                     | <0,001  | 20 (1.5%)          |

**SUPPLEMENTARY TABLE S3. Uni- and multi-variable analysis on factors associated with in-hospital mortality**

|                                                            | OR   | 95%CI     | p Value | AOR* | 95%CI      | p Value |
|------------------------------------------------------------|------|-----------|---------|------|------------|---------|
| <b>Age</b> , per 10 years older                            | 1.98 | 1.78 2.19 | <0.001  | 2.09 | 1.83 2.37  | <0.001  |
| <b>Gender, male</b> (vs. female)                           | 1.26 | 0.97 1.63 | 0.082   | 1.59 | 1.16 2.18  | 0.004   |
| <b>Charlson age unadjusted</b> , per one-point raise index | 1.24 | 1.17 1.31 | <0.001  | 1.14 | 1.08 1.21  | <0.001  |
| <b>CRP &gt;60 mg/L</b> (vs ≤60 mg/L)                       | 3.65 | 2.79 4.79 | <0.001  | 2.58 | 1.856 3.57 | <0.001  |

|                                                                       |       |      |       |        |       |       |       |        |
|-----------------------------------------------------------------------|-------|------|-------|--------|-------|-------|-------|--------|
| <b>D-Dimer &gt; 1.000 ng/mL (vs. &lt;=1.000 ng/mL)</b>                | 3.03  | 2.18 | 4.22  | <0.001 | 1.62  | 1.11  | 2.39  | 0.014  |
| <b>COVID-19 severity at admission (vs mild/moderate)</b>              |       |      |       |        |       |       |       |        |
| Severe                                                                | 2.86  | 2.14 | 3.83  | <0.001 | 2.35  | 1.70  | 3.23  | <0.001 |
| Critical                                                              | 14.26 | 6.85 | 29.68 | <0.001 | 14.11 | 5.90  | 33.77 | <0.001 |
| <b>Anti-inflammatory treatment (steroids and/or immunomodulators)</b> | 1.00  | 0.78 | 1.28  | 0.983  | 1.15  | 0.81  | 1.63  | 0.434  |
| <b>Calendar Period of Admission, Aug-Nov 2020 (vs Feb-Jul 2020)</b>   | 0.57  | 0.45 | 0.73  | <0.001 | 0.47  | 0.33  | 0.65  | <0.001 |
| <b>CA/HCA-BSI</b>                                                     | 1.51  | 0.56 | 4.05  | 0.414  | 1.27  | 0.411 | 3.90  | 0.681  |
| <b>HA-BSI</b>                                                         | 1.38  | 0.75 | 2.53  | 0.297  | 1.29  | 0.65  | 2.54  | 0.463  |

#### SUPPLEMENTARY TABLE S4. STROBE Statement

STROBE Statement—Checklist of items that should be included in reports of *cohort studies*

|                           | Item No | Recommendation                                                                                                                                                                       | Page No |
|---------------------------|---------|--------------------------------------------------------------------------------------------------------------------------------------------------------------------------------------|---------|
| <b>Title and abstract</b> | 1       | (a) Indicate the study's design with a commonly used term in the title or the abstract                                                                                               | 1,2     |
|                           |         | (b) Provide in the abstract an informative and balanced summary of what was done and what was found                                                                                  | 2       |
| <b>Introduction</b>       |         |                                                                                                                                                                                      |         |
| Background/rationale      | 2       | Explain the scientific background and rationale for the investigation being reported                                                                                                 | 3       |
| Objectives                | 3       | State specific objectives, including any prespecified hypotheses                                                                                                                     | 3       |
| <b>Methods</b>            |         |                                                                                                                                                                                      |         |
| Study design              | 4       | Present key elements of study design early in the paper                                                                                                                              | 3       |
| Setting                   | 5       | Describe the setting, locations, and relevant dates, including periods of recruitment, exposure, follow-up, and data collection                                                      | 3, 4    |
| Participants              | 6       | (a) Give the eligibility criteria, and the sources and methods of selection of participants. Describe methods of follow-up                                                           | 3, 4    |
|                           |         | (b) For matched studies, give matching criteria and number of exposed and unexposed                                                                                                  | -       |
| Variables                 | 7       | Clearly define all outcomes, exposures, predictors, potential confounders, and effect modifiers. Give diagnostic criteria, if applicable                                             | 3, 4    |
| Data sources/measurement  | 8*      | For each variable of interest, give sources of data and details of methods of assessment (measurement). Describe comparability of assessment methods if there is more than one group | 4, 5    |
| Bias                      | 9       | Describe any efforts to address potential sources of bias                                                                                                                            | 5, 6    |

|                        |     |                                                                                                                                                                                                              |            |
|------------------------|-----|--------------------------------------------------------------------------------------------------------------------------------------------------------------------------------------------------------------|------------|
| Study size             | 10  | Explain how the study size was arrived at                                                                                                                                                                    | NA         |
| Quantitative variables | 11  | Explain how quantitative variables were handled in the analyses. If applicable, describe which groupings were chosen and why                                                                                 | 5, 6       |
| Statistical methods    | 12  | (a) Describe all statistical methods, including those used to control for confounding                                                                                                                        | 5, 6       |
|                        |     | (b) Describe any methods used to examine subgroups and interactions                                                                                                                                          | NA         |
|                        |     | (c) Explain how missing data were addressed                                                                                                                                                                  | NA         |
|                        |     | (d) If applicable, explain how loss to follow-up was addressed                                                                                                                                               | -          |
|                        |     | (e) Describe any sensitivity analyses                                                                                                                                                                        | -          |
| <b>Results</b>         |     |                                                                                                                                                                                                              |            |
| Participants           | 13* | (a) Report numbers of individuals at each stage of study—eg numbers potentially eligible, examined for eligibility, confirmed eligible, included in the study, completing follow-up, and analysed            | 6          |
|                        |     | (b) Give reasons for non-participation at each stage                                                                                                                                                         | 6          |
|                        |     | (c) Consider use of a flow diagram                                                                                                                                                                           | -          |
| Descriptive data       | 14* | (a) Give characteristics of study participants (eg demographic, clinical, social) and information on exposures and potential confounders                                                                     | Table 1    |
|                        |     | (b) Indicate number of participants with missing data for each variable of interest                                                                                                                          | -          |
|                        |     | (c) Summarise follow-up time (eg, average and total amount)                                                                                                                                                  | 8, 9       |
| Outcome data           | 15* | Report numbers of outcome events or summary measures over time                                                                                                                                               | 8, 9       |
|                        |     |                                                                                                                                                                                                              | Table 2    |
| Main results           | 16  | (a) Give unadjusted estimates and, if applicable, confounder-adjusted estimates and their precision (eg, 95% confidence interval). Make clear which confounders were adjusted for and why they were included | 8, 9       |
|                        |     | (b) Report category boundaries when continuous variables were categorized                                                                                                                                    | Table 4    |
|                        |     | (c) If relevant, consider translating estimates of relative risk into absolute risk for a meaningful time period                                                                                             | Table 1, 2 |
|                        |     |                                                                                                                                                                                                              | -          |
| Other analyses         | 17  | Report other analyses done—eg analyses of subgroups and interactions, and sensitivity analyses                                                                                                               | -          |
| <b>Discussion</b>      |     |                                                                                                                                                                                                              |            |
| Key results            | 18  | Summarise key results with reference to study objectives                                                                                                                                                     | 9          |
| Limitations            | 19  | Discuss limitations of the study, taking into account sources of potential bias or imprecision. Discuss both direction and magnitude of any potential bias                                                   | 11,12      |
| Interpretation         | 20  | Give a cautious overall interpretation of results considering objectives, limitations, multiplicity of analyses, results from similar studies, and other relevant evidence                                   | 9-12       |
| Generalisability       | 21  | Discuss the generalisability (external validity) of the study results                                                                                                                                        | 11,12      |

#### Other information

|         |    |                                                                                                                                                               |    |
|---------|----|---------------------------------------------------------------------------------------------------------------------------------------------------------------|----|
| Funding | 22 | Give the source of funding and the role of the funders for the present study and, if applicable, for the original study on which the present article is based | 13 |
|---------|----|---------------------------------------------------------------------------------------------------------------------------------------------------------------|----|
